# Supplementary material
Source: PubMed Central journal article supplement (PMC7785282)
Supplement: NIHMS1648761-supplement-Paper_1_-_Supplementary_Table_1_US-India_OMOP_Schema_Mapping.pdf [file NIHMS1648761-supplement-Paper_1_-_Supplementary_Table_1_US-India_OMOP_Schema_Mapping.pdf]

| OMOP V5                                              | SEARCH                       | YDR                  | Domain/Variable                                  |
|------------------------------------------------------|------------------------------|----------------------|--------------------------------------------------|
| Person.Person.ID                                     | pid                          | patient_id           | Patient ID                                       |
| Person.Month of birth                                | dbirth                       | birth_date           | Date of Birth                                    |
| Person.Day of birth                                  | 01                           | birth_date           | Date of Birth                                    |
| Person.Year of birth                                 | dbirth                       | birth_date           | Date of Birth                                    |
| Person.gender_concept_id                             | gender                       | sex                  | Gender                                           |
| Person.gender_source_value                           | see concept mapping          | see concept mapping  | Gender                                           |
| Person.race_concept_id                               | race_enroll_pl               | Asian Indian         | Race                                             |
| Person.race_source_value                             | see concept mapping          | see concept mapping  | Race                                             |
| Person.race2_concept_id                              | race_enroll_v2               | Asian Indian         | Race                                             |
| Person.race2_source_value                            | see concept mapping          | see concept mapping  | Race                                             |
| Person.ethnicity_concept_id                          | ethnic_enrollment            | No                   | Ethnicity                                        |
| Person.ethnicity_source_value                        | see concept mapping          | see concept mapping  | Ethnicity                                        |
| Person.language_concept_id                           | langengl, langspan, langothr | tongue               | Language                                         |
| Person.language_source_value                         | see concept mapping          | see concept mapping  | Language                                         |
| Observation/observation_concept_id/4076114           | income                       | <i>not available</i> | Household income                                 |
| Observation/observation_source_value/                | see concept mapping          |                      | Household income                                 |
| Observation/observation_concept_id/2001000000        | maxedu_p                     | education            | Patient Education                                |
| Observation/observation_source_value/                | see concept mapping          | see concept mapping  | Patient Education                                |
| Observation/observation_concept_id/2002000000        | maxedu                       | <i>not available</i> | Parent Education                                 |
| Observation/observation_source_value/                | see concept mapping          |                      | Parent Education                                 |
| Observation/observation_concept_id/443727            | dka_onset                    | dka_hosp             | Diabetic ketoacidosis                            |
| Observation/observation_source_value/                | see concept mapping          | see concept mapping  | Diabetic ketoacidosis                            |
| Observation/observation_concept_id/2003000000        | duration_months              | diabetes_dur         | Diabetes duration                                |
| Observation/observation_source_value/value_as_number |                              |                      | Diabetes duration                                |
| Observation.observation_date                         | d_sample                     | lab_date             | Date of lab visit (when lab measures were taken) |
| Observation.observation_date                         | ipvdate                      | centre_date          | Date of visit (when anthro measures were taken)  |
| Observation.observation_date                         | compldat_corf                | not available        | Date of CORF completed (when ECF was completed)  |
| Observation.observation_date                         | ipsdate                      | not available        | Date of IPS completed                            |
| Condition_occurrence.Condition_start_date            | diagmoyr                     | diagnosis_dt         | Date of Diabetes Diagnosis (from Hierarchy)      |
| Condition_occurrence.Condition_concept_id            | type_provider                | clinical_class       | Diabetes types                                   |
| Condition_occurrence.Condition_source_concept_id     | see concept mapping          | see concept mapping  | Diabetes types                                   |
| Person.Care_Site_ID                                  | subsite                      | centre_code          | Sub-site code                                    |
| Measurement/concept_id/3038553                       | bmi                          | bmi                  | BMI                                              |
| Measurement/measurement_source_value/value_as_number |                              |                      | BMI                                              |
| Measurement/concept_id/2004000001                    | bmi_z                        | bmi_z_cdc            | BMI z-score (CDC)                                |
| Measurement/measurement_source_value/value_as_number |                              |                      | BMI z-score (CDC)                                |
| Measurement/concept_id/2004000002                    | bmi_z_who                    | bmi_z_who            | BMI z-score (WHO)                                |
| Measurement/measurement_source_value/value_as_number |                              |                      | BMI z-score (WHO)                                |
| Measurement/concept_id/40759235                      | nhwaist                      | <i>not available</i> | Waist Circumference by NHANES                    |
| Measurement/measurement_source_value/value_as_number |                              |                      | Waist Circumference by NHANES                    |
| Measurement/concept_id/40759236                      | nawaist                      | <i>not available</i> | Waist Circumference by NCFS                      |
| Measurement/measurement_source_value/value_as_number |                              |                      | Waist Circumference by NCFS                      |
| Measurement/concept_id/2005000001                    | waistht_ratio                | <i>not available</i> | Wasit-Height Ratio                               |
| Measurement/measurement_source_value/value_as_number |                              |                      | Wasit-Height Ratio                               |
| Measurement/concept_id/40789263                      | hba1cpcnt                    | HbA1C_reg            | HbA1C                                            |
| Measurement/measurement_source_value/value_as_number |                              |                      | HbA1C                                            |
| Measurement/concept_id/4269036                       | CPep_ngml                    | <i>not available</i> | Plasma insulin C-peptide level                   |
| Measurement/measurement_source_value/value_as_number |                              |                      | Plasma insulin C-peptide level                   |
| Measurement/concept_id/4194467                       | sbp                          | systolic             | Average systolic blood pressure                  |
| Measurement/measurement_source_value/value_as_number |                              |                      | Average systolic blood pressure                  |

|                                                      |                                |                                                                                                                                                         |                                                                            |
|------------------------------------------------------|--------------------------------|---------------------------------------------------------------------------------------------------------------------------------------------------------|----------------------------------------------------------------------------|
| Measurement/concept_id/4199651                       | dbp                            | diastolic                                                                                                                                               | Average diastolic blood pressure                                           |
| Measurement/measurement_source_value/value_as_number |                                |                                                                                                                                                         | Average diastolic blood pressure                                           |
| Measurement/concept_id/43054908                      | sbp_percent                    | sbp_percent                                                                                                                                             | Pediatric systolic blood pressure percentile [Per age, gender and height]  |
| Measurement/measurement_source_value/value_as_number |                                |                                                                                                                                                         | Pediatric systolic blood pressure percentile [Per age, gender and height]  |
| Measurement/concept_id/43054907                      | dbp_percent                    | dbp_percent                                                                                                                                             | Pediatric diastolic blood pressure percentile [Per age, gender and height] |
| Measurement/measurement_source_value/value_as_number |                                |                                                                                                                                                         | Pediatric diastolic blood pressure percentile [Per age, gender and height] |
| Measurement/concept_id/4260765                       | Tchol_mgdl                     | <i>not available</i>                                                                                                                                    | Serum total cholesterol measurement                                        |
| Measurement/measurement_source_value/value_as_number |                                |                                                                                                                                                         | Serum total cholesterol measurement                                        |
| Measurement/concept_id/4041556                       | LDLChol_mgdl                   | <i>not available</i>                                                                                                                                    | Serum LDL cholesterol measurement                                          |
| Measurement/measurement_source_value/value_as_number |                                |                                                                                                                                                         | Serum LDL cholesterol measurement                                          |
| Measurement/concept_id/4042060                       | VLDLChol_mgdl                  | <i>not available</i>                                                                                                                                    | Serum VLDL cholesterol measurement                                         |
| Measurement/measurement_source_value/value_as_number |                                |                                                                                                                                                         | Serum VLDL cholesterol measurement                                         |
| Measurement/concept_id/4042059                       | HDLChol_mgdl                   | <i>not available</i>                                                                                                                                    | Serum HDL cholesterol measurement                                          |
| Measurement/measurement_source_value/value_as_number |                                |                                                                                                                                                         | Serum HDL cholesterol measurement                                          |
| Measurement/concept_id/4208790                       | nHDLChol_mgdl                  | <i>not available</i>                                                                                                                                    | Non-HDL cholesterol                                                        |
| Measurement/measurement_source_value/value_as_number |                                |                                                                                                                                                         | Non-HDL cholesterol                                                        |
| Measurement/concept_id/4032789                       | Trig_mgdl                      | <i>not available</i>                                                                                                                                    | Triglycerides measurement                                                  |
| Measurement/measurement_source_value/value_as_number |                                |                                                                                                                                                         | Triglycerides measurement                                                  |
| Observation/observation_concept_id/2006000000        | ddatesting_core                | immuno                                                                                                                                                  | Diabetes Autoantibody Tested                                               |
| Observation/observation_source_value/                | see concept mapping            | see concept mapping                                                                                                                                     | Diabetes Autoantibody Tested                                               |
| Measurement/concept_id/2007000000                    | dda_positive                   | <i>not available</i>                                                                                                                                    | Diabetes Autoantibody Positive                                             |
| Measurement/measurement_source_value/                | see concept mapping            |                                                                                                                                                         | Diabetes Autoantibody Positive                                             |
| Measurement/concept_id/43054457                      | gad65dkresult                  | <i>not available</i>                                                                                                                                    | Anti-glutamic acid decarboxylase antibody                                  |
| Measurement/measurement_source_value/                | see concept mapping            |                                                                                                                                                         | Anti-glutamic acid decarboxylase antibody                                  |
| Measurement/concept_id/43054460                      | la2dkresult                    | <i>not available</i>                                                                                                                                    | Anti-islet antigen 2 antibody                                              |
| Measurement/measurement_source_value/                | see concept mapping            |                                                                                                                                                         | Anti-islet antigen 2 antibody                                              |
| Measurement/concept_id/42889904                      | Znt8dkresult                   | <i>not available</i>                                                                                                                                    | Anti-zinc transporter 8 antibody                                           |
| Measurement/measurement_source_value/                | see concept mapping            |                                                                                                                                                         | Anti-zinc transporter 8 antibody                                           |
|                                                      |                                | biguanides, regular_ins, intermediate_ins, premixed_ins, longana_ins, shortana_ins, premixedana_ins, SU, TZD, alphagluco, meglitinide, DPP IV inhibitor | DM Treatment                                                               |
| Observation/observation_concept_id/2010000000        | DM_meds_cat                    |                                                                                                                                                         | DM Treatment                                                               |
| Observation/observation_source_value/                | see concept mapping            | see concept mapping                                                                                                                                     | DM Treatment                                                               |
| Observation/observation_concept_id/2011000000        | CaseStat                       | <i>not available</i>                                                                                                                                    | Case Status                                                                |
| Observation/observation_source_value/                | see concept mapping            |                                                                                                                                                         | Case Status                                                                |
| Measurement/concept_id/3036277                       | height                         | height                                                                                                                                                  | Body height                                                                |
| Measurement/measurement_source_value/value_as_number |                                |                                                                                                                                                         | Body height                                                                |
| Measurement/concept_id/3025315                       | weight                         | weight                                                                                                                                                  | Body weight                                                                |
| Measurement/measurement_source_value/value_as_number |                                |                                                                                                                                                         | Body weight                                                                |
| Measurement/concept_id/40759177                      | brthwtgm                       | birth_weight                                                                                                                                            | Birth weight - Reported                                                    |
| Measurement/measurement_source_value/value_as_number |                                |                                                                                                                                                         | Birth weight - Reported                                                    |
| Observation/observation_concept_id/43021384          | acanthosis_corf; acannigr_phef | skin_tag                                                                                                                                                | Acanthosis nigricans absent                                                |
| Observation/observation_source_value/                | see concept mapping            | see concept mapping                                                                                                                                     | Acanthosis nigricans absent                                                |
| Measurement/concept_id/3037110                       | glucose_mgdl                   | fpg_reg                                                                                                                                                 | Fasting glucose [Mass/volume] in Serum or Plasma                           |
| Measurement/measurement_source_value/value_as_number |                                |                                                                                                                                                         | Fasting glucose [Mass/volume] in Serum or Plasma                           |
| Measurement/concept_id/3001802                       | ACR                            | <i>not available</i>                                                                                                                                    | Microalbumin/Creatinine [Mass Ratio] in Urine                              |
| Measurement/measurement_source_value/value_as_number |                                |                                                                                                                                                         | Microalbumin/Creatinine [Mass Ratio] in Urine                              |
| Observation/observation_concept_id/2012000000        | DM_insulin_cat                 | regimen_ins                                                                                                                                             | DM Insulin Regimen                                                         |
| Observation/observation_source_value/                | see concept mapping            | see concept mapping                                                                                                                                     | DM Insulin Regimen                                                         |
| Observation/observation_concept_id/2013000001        | complication_HTN               | HTN                                                                                                                                                     | Complication of diabetes, Hypertension                                     |
| Observation/observation_source_value/                | see concept mapping            | see concept mapping                                                                                                                                     | Complication of diabetes, Hypertension                                     |

|                                               |                      |                                                                                                 |                                                   |
|-----------------------------------------------|----------------------|-------------------------------------------------------------------------------------------------|---------------------------------------------------|
| Observation/observation_concept_id/2013000002 | complication_DKD     | Nephron                                                                                         | Complication of diabetes, Nephronopathy           |
| Observation/observation_source_value/         | see concept mapping  | see concept mapping                                                                             | Complication of diabetes, Nephronopathy           |
| Observation/observation_concept_id/2013000003 | <i>not available</i> | Retino                                                                                          | Complication of diabetes, Retinopathy             |
| Observation/observation_source_value/         |                      | see concept mapping                                                                             | Complication of diabetes, Retinopathy             |
| Observation/observation_concept_id/2013000004 | <i>not available</i> | Neuro                                                                                           | Complication of diabetes, Neuropathy              |
| Observation/observation_source_value/         |                      | see concept mapping                                                                             | Complication of diabetes, Neuropathy              |
| Observation/observation_concept_id/2013000005 | <i>not available</i> | Sepsis                                                                                          | Complication of diabetes, Sepsis                  |
| Observation/observation_source_value/         |                      | see concept mapping                                                                             | Complication of diabetes, Sepsis                  |
| Observation/observation_concept_id/2013000006 | <i>not available</i> | stroke                                                                                          | Complication of diabetes, Stroke                  |
| Observation/observation_source_value/         |                      | see concept mapping                                                                             | Complication of diabetes, Stroke                  |
| Observation/observation_concept_id/2013000007 | <i>not available</i> | CAD                                                                                             | Complication of diabetes, Coronary Artery Disease |
| Observation/observation_source_value/         |                      | see concept mapping                                                                             | Complication of diabetes, Coronary Artery Disease |
| Observation/observation_concept_id/2013000008 | <i>not available</i> | Dyslip                                                                                          | Complication of diabetes, Dyslipidemia            |
| Observation/observation_source_value/         |                      | see concept mapping                                                                             | Complication of diabetes, Dyslipidemia            |
| Observation/observation_concept_id/2013000009 | <i>not available</i> | Other_comp                                                                                      | Complications of diabetes, Other                  |
| Observation/observation_source_value/         |                      | see concept mapping                                                                             | Complications of diabetes, Other                  |
| Observation/observation_concept_id/2014000001 | <i>not available</i> | Tb                                                                                              | Comorbidity of diabetes, Tuberculosis             |
| Observation/observation_source_value/         |                      | see concept mapping                                                                             | Comorbidity of diabetes, Tuberculosis             |
| Observation/observation_concept_id/2014000002 | hxaddiso_heaq        | <i>not available</i>                                                                            | Comorbidity of diabetes, Addison's Disease        |
| Observation/observation_source_value/         | see concept mapping  |                                                                                                 | Comorbidity of diabetes, Addison's Disease        |
| Observation/observation_concept_id/2014000003 | hxasthma_heaq        | <i>not available</i>                                                                            | Comorbidity of diabetes, Asthma                   |
| Observation/observation_source_value/         | see concept mapping  |                                                                                                 | Comorbidity of diabetes, Asthma                   |
| Observation/observation_concept_id/2014000004 | hxceliac_heaq        | <i>not available</i>                                                                            | Comorbidity of diabetes, Celiac disease           |
| Observation/observation_source_value/         | see concept mapping  |                                                                                                 | Comorbidity of diabetes, Celiac disease           |
| Observation/observation_concept_id/2014000005 | hxhypthy_heaq        | <i>not available</i>                                                                            | Comorbidity of diabetes, Hyperthyroidism          |
| Observation/observation_source_value/         | see concept mapping  |                                                                                                 | Comorbidity of diabetes, Hyperthyroidism          |
| Observation/observation_concept_id/2014000006 | hxlowthy_heaq        | hypothy                                                                                         | Comorbidity of diabetes, Hypothyroidism           |
| Observation/observation_source_value/         | see concept mapping  | see concept mapping                                                                             | Comorbidity of diabetes, Hypothyroidism           |
| Observation/observation_concept_id/2014000007 | hxvitili_heaq        | <i>not available</i>                                                                            | Comorbidity of diabetes, Vitiligo                 |
| Observation/observation_source_value/         | see concept mapping  |                                                                                                 | Comorbidity of diabetes, Vitiligo                 |
|                                               |                      | Mother, Mother_diabetes, Father,<br>Father_diabetes, Male_sib,<br>Malesib_diabetes, Female_sib, |                                                   |
| Observation/observation_concept_id/2015000000 | famhist_dm_ips       | Femalesib_diabetes                                                                              | Family history of diabetes, unspecified type      |
| Observation/observation_source_value/         | see concept mapping  | see concept mapping                                                                             | Family history of diabetes, unspecified type      |
| Observation/observation_concept_id/2016000000 | pubic_tan            | <i>not available</i>                                                                            | Self-reported, Axillary hair Tanner Stage         |
| Observation/observation_source_value/         | see concept mapping  |                                                                                                 | Self-reported, Axillary hair Tanner Stage         |
| Observation/observation_concept_id/2018000000 | breast_tan           | <i>not available</i>                                                                            | Self-reported, Breast Tanner Stage                |
| Observation/observation_source_value/         | see concept mapping  |                                                                                                 | Self-reported, Breast Tanner Stage                |
| Observation/observation_concept_id/4202566    | borncountry_ips2     | 45884233                                                                                        | Country of birth                                  |
| Observation/observation_source_value/         | see concept mapping  |                                                                                                 | Country of birth                                  |
| Observation/observation_concept_id/46235654   | insurance            | <i>not available</i>                                                                            | Primary Insurance                                 |
| Observation/observation_source_value/         | see concept mapping  |                                                                                                 | Primary Insurance                                 |
| Observation/observation_concept_id/2019000000 | hascore              | <i>not available</i>                                                                            | ECF Indicator                                     |
| Observation/observation_source_value/         | see concept mapping  |                                                                                                 | ECF Indicator                                     |
| Observation/observation_concept_id/2020000000 | <i>not available</i> | reporting_code                                                                                  | Reporting Centre Code                             |
| Observation/observation_source_value/         |                      | see concept mapping                                                                             | Reporting Centre Code                             |
