# Supplementary material
Source: PubMed Central journal article supplement (PMC7785282)
Supplement: NIHMS1648761-supplement-Paper_1_-_Supplementary_Table_2__US-India_OMOP_Concept_Mapping.pdf [file NIHMS1648761-supplement-Paper_1_-_Supplementary_Table_2__US-India_OMOP_Concept_Mapping.pdf]

| Target Concept ID | Target Concept Name                                     | Source Concept Code            | Source Concept Name                            | Source Variable Name | Dataset              | Source Registry | Domain            | Vocab ID  |
|-------------------|---------------------------------------------------------|--------------------------------|------------------------------------------------|----------------------|----------------------|-----------------|-------------------|-----------|
| 8532              | Female                                                  | F                              | Female                                         | gender               | IPS                  | SEARCH          | Gender            | Gender    |
| 8507              | Male                                                    | M                              | Male                                           | gender               | IPS                  | SEARCH          | Gender            | Gender    |
| 44814650          | No information                                          | NULL                           | Missing                                        | gender               | IPS                  | SEARCH          | Gender            | PCORNet   |
| 8532              | Female                                                  | 2                              | Female                                         | sex                  | Hierarchy (computed) | YDR             | Gender            | Gender    |
| 8507              | Male                                                    | 1                              | Male                                           | sex                  | Hierarchy (computed) | YDR             | Gender            | Gender    |
| 44814650          | No information                                          | NULL                           | Missing                                        | sex                  | IPS                  | YDR             | Gender            | PCORNet   |
| 38003563          | Yes                                                     | hispanic                       | Hispanic                                       | ethnic_enrollment    | IPS                  | SEARCH          | Ethnicity         | Ethnicity |
| 38003564          | No                                                      | non-hisp                       | Non-Hispanic                                   | ethnic_enrollment    | IPS                  | SEARCH          | Ethnicity         | Ethnicity |
| 44814653          | Unknown                                                 | unk hisp                       | Unknown                                        | ethnic_enrollment    | IPS                  | SEARCH          | Ethnicity         | PCORNet   |
| 38003564          | No                                                      |                                |                                                | ethnicity            |                      | YDR             | Ethnicity         | Ethnicity |
| 38003574          | Asian Indian                                            |                                |                                                | race                 |                      | YDR             | Race              | SNOMED    |
| 8657              | American Indian or Alaska Native                        | natam                          | Native American/Alaska native                  | race_enroll_v2       | IPS                  | SEARCH          | Race              | Race      |
| 38003574          | Asian Indian                                            | asian_ind                      | Asian Indian                                   | race_enroll_v2       | IPS                  | SEARCH          | Race              | SNOMED    |
| 4087922           | Other Asian                                             | asian_other                    | Asian Other                                    | race_enroll_v2       | IPS                  | SEARCH          | Race              | SNOMED    |
| 8516              | Black or African American                               | black                          | African American                               | race_enroll_v2       | IPS                  | SEARCH          | Race              | Race      |
| 8557              | Native Hawaiian or Other Pacific Islander               | pi                             | Pacific Islander                               | race_enroll_v2       | IPS                  | SEARCH          | Race              | Race      |
| 8527              | White                                                   | white                          | Non-Hispanic White                             | race_enroll_v2       | IPS                  | SEARCH          | Race              | Race      |
| 44814653          | Unknown                                                 | miss                           | Unknown                                        | race_enroll_v2       | IPS                  | SEARCH          | Race              | PCORNet   |
| 44814659          | Multiple Races                                          | mult                           | Multiple Races                                 | race_enroll_v2       | IPS                  | SEARCH          | Race              | SNOMED    |
| 8657              | American Indian or Alaska Native                        | natam                          | Native American/Alaska native                  | race_enroll_pi       | IPS                  | SEARCH          | Race              | Race      |
| 38003574          | Asian Indian                                            | asian_ind                      | Asian Indian                                   | race_enroll_pi       | IPS                  | SEARCH          | Race              | SNOMED    |
| 4087922           | Other Asian                                             | asian_other                    | Asian Other                                    | race_enroll_pi       | IPS                  | SEARCH          | Race              | SNOMED    |
| 8516              | Black or African American                               | black                          | African American                               | race_enroll_pi       | IPS                  | SEARCH          | Race              | Race      |
| 8557              | Native Hawaiian or Other Pacific Islander               | pi                             | Pacific Islander                               | race_enroll_pi       | IPS                  | SEARCH          | Race              | Race      |
| 8527              | White                                                   | white                          | Non-Hispanic White                             | race_enroll_pi       | IPS                  | SEARCH          | Race              | Race      |
| 44814653          | Unknown                                                 | miss                           | Unknown                                        | race_enroll_pi       | IPS                  | SEARCH          | Race              | PCORNet   |
| 44814649          | Other                                                   | 20                             | Other                                          | tongue               | Perfoma              | YDR             | Language          | PCORNet   |
| 44814650          | No information                                          | 21                             | Missing                                        | tongue               | Perfoma              | YDR             | Language          | PCORNet   |
| 44784344          | Main spoken language Assamese                           | 1                              | Assamese                                       | tongue               | Perfoma              | YDR             | Language          | SNOMED    |
| 4153314           | Main spoken language Bengali                            | 2                              | Bengali                                        | tongue               | Perfoma              | YDR             | Language          | SNOMED    |
| 4059374           | Gujarati language                                       | 3                              | Gujrati                                        | tongue               | Perfoma              | YDR             | Language          | SNOMED    |
| 4154081           | Main spoken language Hindi                              | 4                              | Hindi                                          | tongue               | Perfoma              | YDR             | Language          | SNOMED    |
| 44782892          | Main spoken language Kanarese                           | 5                              | Kannada                                        | tongue               | Perfoma              | YDR             | Language          | SNOMED    |
| 44782893          | Main spoken language Kashmiri                           | 6                              | Kashmiri                                       | tongue               | Perfoma              | YDR             | Language          | SNOMED    |
| 4256747           | Main spoken language Malayalam                          | 7                              | Malayalam                                      | tongue               | Perfoma              | YDR             | Language          | SNOMED    |
| 44782513          | Main spoken language Marathi                            | 8                              | Marathi                                        | tongue               | Perfoma              | YDR             | Language          | SNOMED    |
| 44782900          | Main spoken language Oriya                              | 9                              | Oriya                                          | tongue               | Perfoma              | YDR             | Language          | SNOMED    |
| 4154083           | Main spoken language Punjabi                            | 10                             | Punjabi                                        | tongue               | Perfoma              | YDR             | Language          | SNOMED    |
| 46285424          | Main spoken language Sanskrit                           | 11                             | Sanskrit                                       | tongue               | Perfoma              | YDR             | Language          | SNOMED    |
| 44782906          | Main spoken language Sindhi                             | 12                             | Sindhi                                         | tongue               | Perfoma              | YDR             | Language          | SNOMED    |
| 4152379           | Main spoken language Tamil                              | 13                             | Tamil                                          | tongue               | Perfoma              | YDR             | Language          | SNOMED    |
| 44782912          | Main spoken language Telugu                             | 14                             | Telugu                                         | tongue               | Perfoma              | YDR             | Language          | SNOMED    |
| 4154084           | Main spoken language Urdu                               | 15                             | Urdu                                           | tongue               | Perfoma              | YDR             | Language          | SNOMED    |
| 4180186           | English                                                 | 16                             | English                                        | tongue               | Perfoma              | YDR             | Language          | SNOMED    |
| 4182957           | Meithe language                                         | 17                             | Maniपुरo                                       | tongue               | Perfoma              | YDR             | Language          | SNOMED    |
| 4183940           | Lushei language                                         | 18                             | Mizo                                           | tongue               | Perfoma              | YDR             | Language          | SNOMED    |
| 44784513          | Main spoken language Nepali                             | 19                             | Nepali                                         | tongue               | Perfoma              | YDR             | Language          | SNOMED    |
| 4180186           | English                                                 | 1                              | English                                        | langengl             | IPS                  | SEARCH          | Language          | SNOMED    |
| 4182511           | Spanish                                                 | 1                              | Spanish                                        | langspan             | IPS                  | SEARCH          | Language          | SNOMED    |
| 44814649          | Other                                                   | 1                              | Other                                          | langothr             | IPS                  | SEARCH          | Language          | PCORNet   |
| 44814650          | No information                                          | null                           | Missing                                        |                      |                      | SEARCH          | Language          | PCORNet   |
| 201254            | Type 1 diabetes mellitus                                | 1                              | Type 1 diabetes                                | type_provider        | Hierarchy (computed) | SEARCH          | Condition         | SNOMED    |
| 201826            | Type 2 diabetes mellitus                                | 2                              | Type 2 diabetes                                | type_provider        | Hierarchy (computed) | SEARCH          | Condition         | SNOMED    |
| 195771            | Secondary diabetes mellitus                             | 3                              | Secondary                                      | type_provider        | Hierarchy (computed) | SEARCH          | Condition         | SNOMED    |
| 40575046          | Maturity onset diabetes mellitus in young               | 4                              | MODY                                           | type_provider        | Hierarchy (computed) | SEARCH          | Condition         | SNOMED    |
| 44814649          | Other                                                   | 5                              | HYBRID                                         | type_provider        | Hierarchy (computed) | SEARCH          | Condition         | SNOMED    |
| 44814649          | Other                                                   | 6                              | Other                                          | type_provider        | Hierarchy (computed) | SEARCH          | Condition         | SNOMED    |
| 44814653          | Unknown                                                 | 7                              | Other/Unknown                                  | type_provider        | Hierarchy (computed) | SEARCH          | Condition         | SNOMED    |
| 201254            | Type 1 diabetes mellitus                                | 1                              | Type1                                          | clinical_class       | Perfoma              | YDR             | Condition         | SNOMED    |
| 201826            | Type 2 diabetes mellitus                                | 2                              | Type2                                          | clinical_class       | Perfoma              | YDR             | Condition         | SNOMED    |
| 4145827           | Latent autoimmune diabetes mellitus in adult (disorder) | 3                              | LADA(Latent Autoimmune Diabetes of Adults)     | clinical_class       | Perfoma              | YDR             | Condition         | SNOMED    |
| 195771            | Secondary diabetes mellitus                             | 9                              | Secondary Diabetes & others                    | clinical_class       | Perfoma              | YDR             | Condition         | SNOMED    |
| 4327944           | Malnutrition related diabetes mellitus                  | 5                              | MMDM(Malnutrition Modulated Diabetes Mellitus) | clinical_class       | Perfoma              | YDR             | Condition         | SNOMED    |
| 4202383           | Drug-induced diabetes mellitus (disorder)               | 7                              | Drug induced Diabetes                          | clinical_class       | Perfoma              | YDR             | Condition         | SNOMED    |
| 4178452           | Diabetes mellitus associated with pancreatic disease    | 8                              | Chronic Pancreatitis                           | clinical_class       | Perfoma              | YDR             | Condition         | SNOMED    |
| 40575046          | Maturity onset diabetes mellitus in young               | 4                              | MODY(Maturity Onset Diabetes of Young)         | clinical_class       | Perfoma              | YDR             | Condition         | SNOMED    |
| 4024659           | Gestational diabetes mellitus                           | 6                              | Gestational Diabetes                           | clinical_class       | Perfoma              | YDR             | Condition         | SNOMED    |
| 200000001         | <\$25K Household Income                                 | <\$25K                         | 1. <\$25K                                      | income               | IPS                  | SEARCH          | Household income  | Custom    |
| 200000002         | \$25-49K Household Income                               | \$25-49K                       | 2. \$25-49K                                    | income               | IPS                  | SEARCH          | Household income  | Custom    |
| 200000003         | \$50-74K Household Income                               | \$50-74K                       | 3. \$50-74K                                    | income               | IPS                  | SEARCH          | Household income  | Custom    |
| 200000004         | \$75K+ Household Income                                 | \$75K+                         | 4. \$75K+                                      | income               | IPS                  | SEARCH          | Household income  | Custom    |
| 44814650          | No Information                                          | DK/Ref                         | 99. DK/Ref                                     | income               | IPS                  | SEARCH          | Household income  | PCORNet   |
| 2001000001        | Patient Education - Less than HS graduate               | Less than HS graduate          | 1. Less than HS graduate                       | maxedu_p             | IPS                  | SEARCH          | Patient Education | Custom    |
| 2001000002        | Patient Education - HS graduate                         | HS graduate                    | 2. HS graduate                                 | maxedu_p             | IPS                  | SEARCH          | Patient Education | Custom    |
| 2001000003        | Patient Education - Some College thru Assoc Degree      | Some College thru Assoc Degree | 3. Some College thru Assoc Degree              | maxedu_p             | IPS                  | SEARCH          | Patient Education | Custom    |
| 2001000004        | Patient Education - Bachelors degree or more            | Bachelors degree or more       | 4. Bachelors degree or more                    | maxedu_p             | IPS                  | SEARCH          | Patient Education | Custom    |
| 44814650          | No Information                                          | missing                        | Missing                                        | maxedu_p             | IPS                  | SEARCH          | Patient Education | PCORNet   |
| 2001000001        | Patient Education - Less than HS graduate               | 0                              | children below 5 years(Not Applicable)         | education            | Perfoma              | YDR             | Patient Education | Custom    |
| 2001000001        | Patient Education - Less than HS graduate               | 1                              | Illiterate                                     | education            | Perfoma              | YDR             | Patient Education | Custom    |
| 2001000001        | Patient Education - Less than HS graduate               | 2                              | Literate                                       | education            | Perfoma              | YDR             | Patient Education | Custom    |
| 2001000001        | Patient Education - Less than HS graduate               | 3                              | Primary                                        | education            | Perfoma              | YDR             | Patient Education | Custom    |
| 2001000001        | Patient Education - Less than HS graduate               | 4                              | Middle                                         | education            | Perfoma              | YDR             | Patient Education | Custom    |
| 2001000002        | Patient Education - HS graduate                         | 5                              | Secondary                                      | education            | Perfoma              | YDR             | Patient Education | Custom    |
| 2001000003        | Patient Education - Some College thru Assoc Degree      | 6                              | Technical                                      | education            | Perfoma              | YDR             | Patient Education | Custom    |

|            |                                                   |          |                                                                                                                                                                                                               |                  |                                             |        |                                |         |
|------------|---------------------------------------------------|----------|---------------------------------------------------------------------------------------------------------------------------------------------------------------------------------------------------------------|------------------|---------------------------------------------|--------|--------------------------------|---------|
| 2001000004 | Patient Education - Bachelors degree or more      | 7        | College & above                                                                                                                                                                                               | education        | Performa                                    | YDR    | Patient Education              | Custom  |
| 44814650   | No Information                                    | 8        | Unknown                                                                                                                                                                                                       | education        | Performa                                    | YDR    | Patient Education              | PCORNet |
| 2002000001 | Parent Education - Less than HS graduate          | 1        | 1. Less than HS graduate                                                                                                                                                                                      | maxedu           | IPS                                         | SEARCH | Parent Education               | Custom  |
| 2002000002 | Parent Education - HS graduate                    | 2        | 2. HS graduate                                                                                                                                                                                                | maxedu           | IPS                                         | SEARCH | Parent Education               | Custom  |
| 2002000003 | Parent Education - Some College thru Assoc Degree | 3        | 3. Some College thru Assoc Degree                                                                                                                                                                             | maxedu           | IPS                                         | SEARCH | Parent Education               | Custom  |
| 2002000004 | Parent Education - Bachelors degree or more       | 4        | 4. Bachelors degree or more                                                                                                                                                                                   | maxedu           | IPS                                         | SEARCH | Parent Education               | Custom  |
| 44814650   | No Information                                    | missing  | Missing                                                                                                                                                                                                       | maxedu           | IPS                                         | SEARCH | Parent Education               | PCORNet |
| 4188539    | Yes                                               | 1        | Yes                                                                                                                                                                                                           | dka_onset        | ECF                                         | SEARCH | Diabetic ketoacidosis          | SNOMED  |
| 4188540    | No                                                | 2        | No                                                                                                                                                                                                            | dka_onset        | ECF                                         | SEARCH | Diabetic ketoacidosis          | SNOMED  |
| 44814650   | No Information                                    | .        | Missing                                                                                                                                                                                                       | dka_onset        | ECF                                         | SEARCH | Diabetic ketoacidosis          | PCORNet |
| 4188539    | Yes                                               | 1        | Yes                                                                                                                                                                                                           | dka_hosp         | Performa                                    | YDR    | Diabetic ketoacidosis          | SNOMED  |
| 4188540    | No                                                | 2        | No                                                                                                                                                                                                            | dka_hosp         | Performa                                    | YDR    | Diabetic ketoacidosis          | SNOMED  |
| 44814650   | No Information                                    | .        | Missing                                                                                                                                                                                                       | dka_hosp         | Performa                                    | YDR    | Diabetic ketoacidosis          | PCORNet |
| 4188539    | Yes                                               | 1        | Yes                                                                                                                                                                                                           | dda_testing      | ECF (computed)                              | SEARCH | Diabetes Autoantibody Tested   | SNOMED  |
| 4188540    | No                                                | 2        | No                                                                                                                                                                                                            | dda_testing      | ECF (computed)                              | SEARCH | Diabetes Autoantibody Tested   | SNOMED  |
| 44814650   | No Information                                    | missing  | Missing                                                                                                                                                                                                       | dda_testing      | ECF (computed)                              | SEARCH | Diabetes Autoantibody Tested   | PCORNet |
| 4188539    | Yes                                               | 1        | Yes                                                                                                                                                                                                           | immuno_test      | Performa                                    | YDR    | Diabetes Autoantibody Tested   | SNOMED  |
| 4188540    | No                                                | 2        | No                                                                                                                                                                                                            | immuno_test      | Performa                                    | YDR    | Diabetes Autoantibody Tested   | SNOMED  |
| 44814650   | No Information                                    | .        | Missing                                                                                                                                                                                                       | immuno_test      | Performa                                    | YDR    | Diabetes Autoantibody Tested   | PCORNet |
| 4188539    | Yes                                               | 1        | Yes                                                                                                                                                                                                           | dda_positive     | ECF (computed)                              | SEARCH | Diabetes Autoantibody Positive | SNOMED  |
| 4188540    | No                                                | 2        | No                                                                                                                                                                                                            | dda_positive     | ECF (computed)                              | SEARCH | Diabetes Autoantibody Positive | SNOMED  |
| 44814650   | No Information                                    | missing  | Missing                                                                                                                                                                                                       | dda_positive     | ECF (computed)                              | SEARCH | Diabetes Autoantibody Positive | PCORNet |
| 2008000000 | Positive                                          | POSITIVE | POSITIVE                                                                                                                                                                                                      | gad65dkresult    | LAB                                         | SEARCH | Diabetes Autoantibody - GAD 65 | Custom  |
| 2009000000 | Negative                                          | NEGATIVE | NEGATIVE                                                                                                                                                                                                      | gad65dkresult    | LAB                                         | SEARCH | Diabetes Autoantibody - GAD 65 | Custom  |
| 44814650   | No Information                                    | missing  | Missing                                                                                                                                                                                                       | gad65dkresult    | LAB                                         | SEARCH | Diabetes Autoantibody - GAD 65 | PCORNet |
| 2008000000 | Positive                                          | POSITIVE | POSITIVE                                                                                                                                                                                                      | la2dkresult      | LAB                                         | SEARCH | Diabetes Autoantibody -IA2     | Custom  |
| 2009000000 | Negative                                          | NEGATIVE | NEGATIVE                                                                                                                                                                                                      | la2dkresult      | LAB                                         | SEARCH | Diabetes Autoantibody -IA2     | Custom  |
| 44814650   | No Information                                    | missing  | Missing                                                                                                                                                                                                       | la2dkresult      | LAB                                         | SEARCH | Diabetes Autoantibody -IA2     | PCORNet |
| 2008000000 | Positive                                          | POSITIVE | POSITIVE                                                                                                                                                                                                      | Znt8dkresult     | LAB                                         | SEARCH | Diabetes Autoantibody - ZnT8   | Custom  |
| 2009000000 | Negative                                          | NEGATIVE | NEGATIVE                                                                                                                                                                                                      | Znt8dkresult     | LAB                                         | SEARCH | Diabetes Autoantibody - ZnT8   | Custom  |
| 44814650   | No Information                                    | missing  | Missing                                                                                                                                                                                                       | Znt8dkresult     | LAB                                         | SEARCH | Diabetes Autoantibody - ZnT8   | PCORNet |
| 2010000001 | Metformin Only                                    | 1        | Metformin Only                                                                                                                                                                                                | DM_meds_cat      | Health Questionnaire & Medication Inventory | SEARCH | DM Treatment                   | Custom  |
| 2010000002 | Insulin Only                                      | 2        | Insulin Only                                                                                                                                                                                                  | DM_meds_cat      | Health Questionnaire & Medication Inventory | SEARCH | DM Treatment                   | Custom  |
| 2010000003 | Insulin + Other Orals                             | 3        | Insulin + Other Orals                                                                                                                                                                                         | DM_meds_cat      | Health Questionnaire & Medication Inventory | SEARCH | DM Treatment                   | Custom  |
| 2010000004 | Other Oral                                        | 4        | Other Oral                                                                                                                                                                                                    | DM_meds_cat      | Health Questionnaire & Medication Inventory | SEARCH | DM Treatment                   | Custom  |
| 45878582   | None                                              | 5        | None                                                                                                                                                                                                          | DM_meds_cat      | Health Questionnaire & Medication Inventory | SEARCH | DM Treatment                   | LOINC   |
| 2010000006 | Insulin + Metformin                               | 6        | Insulin + Metformin                                                                                                                                                                                           | DM_meds_cat      | Health Questionnaire & Medication Inventory | SEARCH | DM Treatment                   | Custom  |
| 44814650   | No Information                                    | .        | missing                                                                                                                                                                                                       | DM_meds_cat      | Health Questionnaire & Medication Inventory | SEARCH | DM Treatment                   | PCORNet |
| 2010000002 | Insulin Only                                      | 1        | Yes                                                                                                                                                                                                           | regular_ins      | Performa                                    | YDR    | DM Treatment                   | Custom  |
| 2010000002 | Insulin Only                                      | 1        | Yes                                                                                                                                                                                                           | intermediate_ins | Performa                                    | YDR    | DM Treatment                   | Custom  |
| 2010000002 | Insulin Only                                      | 1        | Yes                                                                                                                                                                                                           | premixed_ins     | Performa                                    | YDR    | DM Treatment                   | Custom  |
| 2010000002 | Insulin Only                                      | 1        | Yes                                                                                                                                                                                                           | longana_ins      | Performa                                    | YDR    | DM Treatment                   | Custom  |
| 2010000002 | Insulin Only                                      | 1        | Yes                                                                                                                                                                                                           | shortana_ins     | Performa                                    | YDR    | DM Treatment                   | Custom  |
| 2010000002 | Insulin Only                                      | 1        | Yes                                                                                                                                                                                                           | premixedana_ins  | Performa                                    | YDR    | DM Treatment                   | Custom  |
| 2010000001 | Metformin Only                                    | 1        | Yes                                                                                                                                                                                                           | biguanides       | Performa                                    | YDR    | DM Treatment                   | Custom  |
| 2010000004 | Other Oral                                        | 1        | Yes                                                                                                                                                                                                           | SU               | Performa                                    | YDR    | DM Treatment                   | Custom  |
| 2010000004 | Other Oral                                        | 1        | Yes                                                                                                                                                                                                           | TZD              | Performa                                    | YDR    | DM Treatment                   | Custom  |
| 2010000004 | Other Oral                                        | 1        | Yes                                                                                                                                                                                                           | alphagluco       | Performa                                    | YDR    | DM Treatment                   | Custom  |
| 2010000004 | Other Oral                                        | 1        | Yes                                                                                                                                                                                                           | meglitinide      | Performa                                    | YDR    | DM Treatment                   | Custom  |
| 2010000004 | Other Oral                                        | 1        | Yes                                                                                                                                                                                                           | dpp              | Performa                                    | YDR    | DM Treatment                   | Custom  |
| 2010000003 | Insulin + Other Orals                             |          | IF (regular_ins=1 OR intermediate_ins=1 OR premixed_ins=1 OR longana_ins=1 OR shortana_ins=1 OR premixedana_ins=1) AND (SU=1 OR TZD=1 OR alphagluco=1 OR meglitinide=1 OR DPP IV inhibitor=1 OR biguanides=1) |                  | Performa                                    | YDR    | DM Treatment                   | Custom  |
| 2010000006 | Insulin + Metformin                               |          | IF (regular_ins=1 OR intermediate_ins=1 OR premixed_ins=1 OR longana_ins=1 OR shortana_ins=1 OR premixedana_ins=1) AND (SU=1 OR TZD=1 OR alphagluco=1 OR meglitinide=1 OR DPP IV inhibitor=1 OR biguanides=1) |                  | Performa                                    | YDR    | DM Treatment                   | Custom  |
| 45878582   | None                                              |          | IF (regular_ins=0 AND intermediate_ins=0 AND premixed_ins=0 AND longana_ins=0 AND shortana_ins=0 AND premixedana_ins=0 AND SU=0 OR TZD=0 AND alphagluco=0 AND meglitinide=0 AND dpp=0 AND biguanides=0)       |                  | Performa                                    | YDR    | DM Treatment                   | LOINC   |
| 2011000001 | Prevalent 2001                                    | 1        | Prevalent 2001                                                                                                                                                                                                | CaseStat         | Computed                                    | SEARCH | Case Status                    | Custom  |
| 2011000002 | Incident 2002                                     | 2        | Incident 2002                                                                                                                                                                                                 | CaseStat         | Computed                                    | SEARCH | Case Status                    | Custom  |
| 2011000003 | Incident 2003                                     | 3        | Incident 2003                                                                                                                                                                                                 | CaseStat         | Computed                                    | SEARCH | Case Status                    | Custom  |
| 2011000004 | Incident 2004                                     | 4        | Incident 2004                                                                                                                                                                                                 | CaseStat         | Computed                                    | SEARCH | Case Status                    | Custom  |
| 2011000005 | Incident 2005                                     | 8        | Incident 2005                                                                                                                                                                                                 | CaseStat         | Computed                                    | SEARCH | Case Status                    | Custom  |
| 2011000006 | Incident 2006                                     | 9        | Incident 2006                                                                                                                                                                                                 | CaseStat         | Computed                                    | SEARCH | Case Status                    | Custom  |
| 2011000007 | Incident 2007                                     | 10       | Incident 2007                                                                                                                                                                                                 | CaseStat         | Computed                                    | SEARCH | Case Status                    | Custom  |
| 2011000008 | Incident 2008                                     | 11       | Incident 2008                                                                                                                                                                                                 | CaseStat         | Computed                                    | SEARCH | Case Status                    | Custom  |
| 2011000009 | Incident 2009                                     | 12       | Incident 2009                                                                                                                                                                                                 | CaseStat         | Computed                                    | SEARCH | Case Status                    | Custom  |
| 2011000010 | Incident 2010                                     | 13       | Incident 2010                                                                                                                                                                                                 | CaseStat         | Computed                                    | SEARCH | Case Status                    | Custom  |
| 2011000011 | Incident 2011                                     | 14       | Incident 2011                                                                                                                                                                                                 | CaseStat         | Computed                                    | SEARCH | Case Status                    | Custom  |
| 2011000012 | Incident 2012                                     | 15       | Incident 2012                                                                                                                                                                                                 | CaseStat         | Computed                                    | SEARCH | Case Status                    | Custom  |
| 2011000090 | Prevalent 2009                                    | 90       | Prevalent 2009                                                                                                                                                                                                | CaseStat         | Computed                                    | SEARCH | Case Status                    | Custom  |
| 4188539    | Yes                                               | 2        | No                                                                                                                                                                                                            | skin_tag         | Performa                                    | YDR    | Acanthosis nigricans absent    | SNOMED  |
| 4188540    | No                                                | 1        | Yes                                                                                                                                                                                                           | skin_tag         | Performa                                    | YDR    | Acanthosis nigricans absent    | SNOMED  |
| 44814650   | No Information                                    | .        | missing                                                                                                                                                                                                       | skin_tag         | Performa                                    | YDR    | Acanthosis nigricans absent    | PCORNet |
| 4188539    | Yes                                               |          | IF (acannigr_phef=2) OR (acannigr_phef='1' AND acanthosis_corf=2) OR (acannigr_phef='3' AND acanthosis_corf=2)                                                                                                | No               | acanthosis_corf; acannigr_phef              | ECF    | Acanthosis nigricans absent    | SNOMED  |

|            |                |                                                                                                              |                    |                               |                                             |        |                                                   |         |
|------------|----------------|--------------------------------------------------------------------------------------------------------------|--------------------|-------------------------------|---------------------------------------------|--------|---------------------------------------------------|---------|
| 4188540    | No             | IF (acannigr_phef=1) OR (acannigr_phef=' AND acanthosis_corf=1) OR (acannigr_phef='3' AND acanthosis_corf=1) | Yes                | acanthosis_corf;acannigr_phef | ECF                                         | SEARCH | Acanthosis nigricans absent                       | SNOMED  |
| 44814650   | No Information | IF (acanthosis_corf=' AND acannigr_phef=' ) OR (acannigr_phef='3' AND acanthosis_corf=' )                    | missing            | acanthosis_corf;acannigr_phef | ECF                                         | SEARCH | Acanthosis nigricans absent                       | PCORNet |
| 2012000001 | Pump           | 1                                                                                                            | Pump               | DM_insulin_cat                | Health Questionnaire & Medication Inventory | SEARCH | DM Insulin Regimen                                | Custom  |
| 2012000002 | Basal/Bolus    | 2                                                                                                            | Basal/Bolus        | DM_insulin_cat                | Health Questionnaire & Medication Inventory | SEARCH | DM Insulin Regimen                                | Custom  |
| 2012000003 | MDI            | 3                                                                                                            | MDI                | DM_insulin_cat                | Health Questionnaire & Medication Inventory | SEARCH | DM Insulin Regimen                                | Custom  |
| 2012000004 | Older regimens | 4                                                                                                            | Older regimens     | DM_insulin_cat                | Health Questionnaire & Medication Inventory | SEARCH | DM Insulin Regimen                                | Custom  |
| 2012000005 | Other          | 9                                                                                                            | Other              | DM_insulin_cat                | Health Questionnaire & Medication Inventory | SEARCH | DM Insulin Regimen                                | Custom  |
| 2012000099 | Unknown        | 5                                                                                                            | Unknown            | DM_insulin_cat                | Health Questionnaire & Medication Inventory | SEARCH | DM Insulin Regimen                                | Custom  |
| 44814650   | No Information | .                                                                                                            | missing            | DM_insulin_cat                | Health Questionnaire & Medication Inventory | SEARCH | DM Insulin Regimen                                | PCORNet |
| 2012000001 | Pump           | 5                                                                                                            | Pump               | insulin_reg                   | Performa                                    | YDR    | DM Insulin Regimen                                | Custom  |
| 2012000002 | Basal/Bolus    | 4                                                                                                            | Multidose          | insulin_reg                   | Performa                                    | YDR    | DM Insulin Regimen                                | Custom  |
| 2012000003 | MDI            | 1                                                                                                            | Thrice a day (TDS) | insulin_reg                   | Performa                                    | YDR    | DM Insulin Regimen                                | Custom  |
| 2012000004 | Older regimens | 3                                                                                                            | Twice a day (BD)   | insulin_reg                   | Performa                                    | YDR    | DM Insulin Regimen                                | Custom  |
| 2012000004 | Older regimens | 2                                                                                                            | Once a day (OD)    | insulin_reg                   | Performa                                    | YDR    | DM Insulin Regimen                                | Custom  |
| 44814650   | No Information | missing                                                                                                      | Missing            | insulin_reg                   | Performa                                    | YDR    | DM Insulin Regimen                                | PCORNet |
| 4188539    | Yes            | 1                                                                                                            | Yes                | complication_HTN              |                                             | SEARCH | Complication of diabetes, Hypertension            | SNOMED  |
| 4188540    | No             | 0                                                                                                            | No                 | complication_HTN              |                                             | SEARCH | Complication of diabetes, Hypertension            | SNOMED  |
| 44814650   | No Information | .                                                                                                            | Missing            | complication_HTN              |                                             | SEARCH | Complication of diabetes, Hypertension            | PCORNet |
| 4188539    | Yes            | 1                                                                                                            | Yes                | HTN                           | Performa                                    | YDR    | Complication of diabetes, Hypertension            | SNOMED  |
| 4188540    | No             | 2                                                                                                            | No                 | HTN                           | Performa                                    | YDR    | Complication of diabetes, Hypertension            | SNOMED  |
| 44814650   | No Information | 3                                                                                                            | Missing            | HTN                           | Performa                                    | YDR    | Complication of diabetes, Hypertension            | PCORNet |
| 4188539    | Yes            | 1                                                                                                            | Yes                | complication_DKD              |                                             | SEARCH | Complication of diabetes, Nephronopathy           | SNOMED  |
| 4188540    | No             | 0                                                                                                            | No                 | complication_DKD              |                                             | SEARCH | Complication of diabetes, Nephronopathy           | SNOMED  |
| 44814650   | No Information | .                                                                                                            | Missing            | complication_DKD              |                                             | SEARCH | Complication of diabetes, Nephronopathy           | PCORNet |
| 4188539    | Yes            | 1                                                                                                            | Yes                | Nephron                       | Performa                                    | YDR    | Complication of diabetes, Nephronopathy           | SNOMED  |
| 4188540    | No             | 2                                                                                                            | No                 | Nephron                       | Performa                                    | YDR    | Complication of diabetes, Nephronopathy           | SNOMED  |
| 44814650   | No Information | 3                                                                                                            | Unknown            | Nephron                       | Performa                                    | YDR    | Complication of diabetes, Nephronopathy           | PCORNet |
| 44814650   | No Information | missing                                                                                                      | Missing            | Nephron                       | Performa                                    | YDR    | Complication of diabetes, Nephronopathy           | PCORNet |
| 4188539    | Yes            | 1                                                                                                            | Yes                | Retino                        | Performa                                    | YDR    | Complication of diabetes, Retinopathy             | SNOMED  |
| 4188540    | No             | 2                                                                                                            | No                 | Retino                        | Performa                                    | YDR    | Complication of diabetes, Retinopathy             | SNOMED  |
| 44814650   | No Information | 3                                                                                                            | Unknown            | Retino                        | Performa                                    | YDR    | Complication of diabetes, Retinopathy             | PCORNet |
| 44814650   | No Information | missing                                                                                                      | Missing            | Retino                        | Performa                                    | YDR    | Complication of diabetes, Retinopathy             | PCORNet |
| 4188539    | Yes            | 1                                                                                                            | Yes                | Neuro                         | Performa                                    | YDR    | Complication of diabetes, Neuropathy              | SNOMED  |
| 4188540    | No             | 2                                                                                                            | No                 | Neuro                         | Performa                                    | YDR    | Complication of diabetes, Neuropathy              | SNOMED  |
| 44814650   | No Information | 3                                                                                                            | Unknown            | Neuro                         | Performa                                    | YDR    | Complication of diabetes, Neuropathy              | PCORNet |
| 44814650   | No Information | missing                                                                                                      | Missing            | Neuro                         | Performa                                    | YDR    | Complication of diabetes, Neuropathy              | PCORNet |
| 4188539    | Yes            | 1                                                                                                            | Yes                | Tb                            | Performa                                    | YDR    | Comorbidity of diabetes, Tuberculosis             | SNOMED  |
| 4188540    | No             | 2                                                                                                            | No                 | Tb                            | Performa                                    | YDR    | Comorbidity of diabetes, Tuberculosis             | SNOMED  |
| 44814650   | No Information | 3                                                                                                            | Unknown            | Tb                            | Performa                                    | YDR    | Comorbidity of diabetes, Tuberculosis             | PCORNet |
| 44814650   | No Information | missing                                                                                                      | Missing            | Tb                            | Performa                                    | YDR    | Comorbidity of diabetes, Tuberculosis             | PCORNet |
| 4188539    | Yes            | 1                                                                                                            | Yes                | Sepsis                        | Performa                                    | YDR    | Complication of diabetes, Sepsis                  | SNOMED  |
| 4188540    | No             | 2                                                                                                            | No                 | Sepsis                        | Performa                                    | YDR    | Complication of diabetes, Sepsis                  | SNOMED  |
| 44814650   | No Information | 3                                                                                                            | Unknown            | Sepsis                        | Performa                                    | YDR    | Complication of diabetes, Sepsis                  | PCORNet |
| 44814650   | No Information | missing                                                                                                      | Missing            | Sepsis                        | Performa                                    | YDR    | Complication of diabetes, Sepsis                  | PCORNet |
| 4188539    | Yes            | 1                                                                                                            | Yes                | stroke                        | Performa                                    | YDR    | Complication of diabetes, Stroke                  | SNOMED  |
| 4188540    | No             | 2                                                                                                            | No                 | stroke                        | Performa                                    | YDR    | Complication of diabetes, Stroke                  | SNOMED  |
| 44814650   | No Information | 3                                                                                                            | Unknown            | stroke                        | Performa                                    | YDR    | Complication of diabetes, Stroke                  | PCORNet |
| 44814650   | No Information | missing                                                                                                      | Missing            | stroke                        | Performa                                    | YDR    | Complication of diabetes, Stroke                  | PCORNet |
| 4188539    | Yes            | 1                                                                                                            | Yes                | CAD                           | Performa                                    | YDR    | Complication of diabetes, Coronary Artery Disease | SNOMED  |
| 4188540    | No             | 2                                                                                                            | No                 | CAD                           | Performa                                    | YDR    | Complication of diabetes, Coronary Artery Disease | SNOMED  |
| 44814650   | No Information | 3                                                                                                            | Unknown            | CAD                           | Performa                                    | YDR    | Complication of diabetes, Coronary Artery Disease | PCORNet |
| 44814650   | No Information | missing                                                                                                      | Missing            | CAD                           | Performa                                    | YDR    | Complication of diabetes, Coronary Artery Disease | PCORNet |
| 4188539    | Yes            | 1                                                                                                            | Yes                | Other_comp                    | Performa                                    | YDR    | Complications of diabetes, Other                  | SNOMED  |
| 4188540    | No             | 2                                                                                                            | No                 | Other_comp                    | Performa                                    | YDR    | Complications of diabetes, Other                  | SNOMED  |
| 44814650   | No Information | 3                                                                                                            | Unknown            | Other_comp                    | Performa                                    | YDR    | Complications of diabetes, Other                  | PCORNet |
| 44814650   | No Information | missing                                                                                                      | Missing            | Other_comp                    | Performa                                    | YDR    | Complications of diabetes, Other                  | PCORNet |
| 4188539    | Yes            | 1                                                                                                            | Yes                | Dyslip                        | Performa                                    | YDR    | Complication of diabetes, Dyslipidemia            | SNOMED  |
| 4188540    | No             | 2                                                                                                            | No                 | Dyslip                        | Performa                                    | YDR    | Complication of diabetes, Dyslipidemia            | SNOMED  |
| 44814650   | No Information | 3                                                                                                            | Unknown            | Dyslip                        | Performa                                    | YDR    | Complication of diabetes, Dyslipidemia            | PCORNet |
| 44814650   | No Information | missing                                                                                                      | Missing            | Dyslip                        | Performa                                    | YDR    | Complication of diabetes, Dyslipidemia            | PCORNet |
| 4188539    | Yes            | 1                                                                                                            | Yes                | hxaddiso_heaq                 |                                             | SEARCH | Comorbidity of diabetes, Addison's Disease        | SNOMED  |
| 4188540    | No             | 2                                                                                                            | No                 | hxaddiso_heaq                 |                                             | SEARCH | Comorbidity of diabetes, Addison's Disease        | SNOMED  |
| 44814650   | No Information | .                                                                                                            | Missing            | hxaddiso_heaq                 |                                             | SEARCH | Comorbidity of diabetes, Addison's Disease        | PCORNet |
| 4188539    | Yes            | 1                                                                                                            | Yes                | hxasthma_heaq                 |                                             | SEARCH | Comorbidity of diabetes, Asthma                   | SNOMED  |
| 4188540    | No             | 2                                                                                                            | No                 | hxasthma_heaq                 |                                             | SEARCH | Comorbidity of diabetes, Asthma                   | SNOMED  |
| 44814650   | No Information | .                                                                                                            | Missing            | hxasthma_heaq                 |                                             | SEARCH | Comorbidity of diabetes, Asthma                   | PCORNet |
| 4188539    | Yes            | 1                                                                                                            | Yes                | hxceliac_heaq                 |                                             | SEARCH | Comorbidity of diabetes, Celiac disease           | SNOMED  |
| 4188540    | No             | 2                                                                                                            | No                 | hxceliac_heaq                 |                                             | SEARCH | Comorbidity of diabetes, Celiac disease           | SNOMED  |
| 44814650   | No Information | .                                                                                                            | Missing            | hxceliac_heaq                 |                                             | SEARCH | Comorbidity of diabetes, Celiac disease           | PCORNet |
| 4188539    | Yes            | 1                                                                                                            | Yes                | hxhypthy_heaq                 |                                             | SEARCH | Comorbidity of diabetes, Hypothyroidism           | SNOMED  |
| 4188540    | No             | 2                                                                                                            | No                 | hxhypthy_heaq                 |                                             | SEARCH | Comorbidity of diabetes, Hypothyroidism           | SNOMED  |
| 44814650   | No Information | .                                                                                                            | Missing            | hxhypthy_heaq                 |                                             | SEARCH | Comorbidity of diabetes, Hypothyroidism           | PCORNet |
| 4188539    | Yes            | 1                                                                                                            | Yes                | hxlowthy_heaq                 |                                             | SEARCH | Comorbidity of diabetes, Hypothyroidism           | SNOMED  |
| 4188540    | No             | 2                                                                                                            | No                 | hxlowthy_heaq                 |                                             | SEARCH | Comorbidity of diabetes, Hypothyroidism           | SNOMED  |
| 44814650   | No Information | .                                                                                                            | Missing            | hxlowthy_heaq                 |                                             | SEARCH | Comorbidity of diabetes, Hypothyroidism           | PCORNet |
| 4188539    | Yes            | 1                                                                                                            | Yes                | hypothy                       | Performa                                    | YDR    | Comorbidity of diabetes, Hypothyroidism           | SNOMED  |
| 4188540    | No             | 2                                                                                                            | No                 | hypothy                       | Performa                                    | YDR    | Comorbidity of diabetes, Hypothyroidism           | SNOMED  |
| 44814650   | No Information | .                                                                                                            | Missing            | hypothy                       | Performa                                    | YDR    | Comorbidity of diabetes, Hypothyroidism           | PCORNet |
| 4188539    | Yes            | 1                                                                                                            | Yes                | hxvitili_heaq                 |                                             | SEARCH | Comorbidity of diabetes, Vitiligo                 | SNOMED  |
| 4188540    | No             | 2                                                                                                            | No                 | hxvitili_heaq                 |                                             | SEARCH | Comorbidity of diabetes, Vitiligo                 | SNOMED  |

|            |                                                    |                                                                                                                                                                                             |                               |                                      |          |                                   |                                                         |
|------------|----------------------------------------------------|---------------------------------------------------------------------------------------------------------------------------------------------------------------------------------------------|-------------------------------|--------------------------------------|----------|-----------------------------------|---------------------------------------------------------|
| 44814650   | No Information                                     | .                                                                                                                                                                                           | Missing                       | hxvitilli_hsaq                       | SEARCH   | Comorbidity of diabetes, Vitiligo | PCORNet                                                 |
| 4188539    | Yes                                                | IF (Mother=1 OR Father=1 OR Male_sib=1 OR Female_sib=1)                                                                                                                                     |                               | Mother, Father, Male_sib, Female_sib | Performa | YDR                               | Family history of diabetes, unspecified type<br>SNOMED  |
| 4188540    | No                                                 | IF (Mother=2 AND Father=2 AND Male_sib=2 AND Female_sib=2)<br>IF (Mother= OR Mother = 3) AND (Father= OR Father = 3) AND<br>(Male_sib= OR Male_sib = 3) AND (Female_sib= OR Female_sib = 3) |                               | Mother, Father, Male_sib, Female_sib | Performa | YDR                               | Family history of diabetes, unspecified type<br>SNOMED  |
| 44814650   | No Information                                     | .                                                                                                                                                                                           | Missing                       | hxvitilli_hsaq                       | SEARCH   | Comorbidity of diabetes, Vitiligo | PCORNet                                                 |
| 4188539    | Yes                                                | 1                                                                                                                                                                                           | Yes                           | famhist_dm                           | Performa | SEARCH                            | Family history of diabetes, unspecified type<br>SNOMED  |
| 4188540    | No                                                 | 2                                                                                                                                                                                           | No                            | famhist_dm                           | Performa | SEARCH                            | Family history of diabetes, unspecified type<br>SNOMED  |
| 44814650   | No Information                                     | .                                                                                                                                                                                           | Missing                       | famhist_dm                           | Performa | SEARCH                            | Family history of diabetes, unspecified type<br>PCORNet |
| 2016000001 | Breast Tanner Stage 1                              | 1                                                                                                                                                                                           | 1                             | breast_tan                           |          | SEARCH                            | Self-reported, Breast Tanner Stage<br>Custom            |
| 2016000002 | Breast Tanner Stage 2                              | 2                                                                                                                                                                                           | 2                             | breast_tan                           |          | SEARCH                            | Self-reported, Breast Tanner Stage<br>Custom            |
| 2016000003 | Breast Tanner Stage 3                              | 3                                                                                                                                                                                           | 3                             | breast_tan                           |          | SEARCH                            | Self-reported, Breast Tanner Stage<br>Custom            |
| 2016000004 | Breast Tanner Stage 4                              | 4                                                                                                                                                                                           | 4                             | breast_tan                           |          | SEARCH                            | Self-reported, Breast Tanner Stage<br>Custom            |
| 2016000005 | Breast Tanner Stage 5                              | 5                                                                                                                                                                                           | 5                             | breast_tan                           |          | SEARCH                            | Self-reported, Breast Tanner Stage<br>Custom            |
| 2018000001 | Axillary hair Tanner Stage 1                       | 1                                                                                                                                                                                           | 1                             | pubic_tan                            |          | SEARCH                            | Self-reported, Axillary hair Tanner Stage<br>Custom     |
| 2018000002 | Axillary hair Tanner Stage 2                       | 2                                                                                                                                                                                           | 2                             | pubic_tan                            |          | SEARCH                            | Self-reported, Axillary hair Tanner Stage<br>Custom     |
| 2018000003 | Axillary hair Tanner Stage 3                       | 3                                                                                                                                                                                           | 3                             | pubic_tan                            |          | SEARCH                            | Self-reported, Axillary hair Tanner Stage<br>Custom     |
| 2018000004 | Axillary hair Tanner Stage 4                       | 4                                                                                                                                                                                           | 4                             | pubic_tan                            |          | SEARCH                            | Self-reported, Axillary hair Tanner Stage<br>Custom     |
| 2018000005 | Axillary hair Tanner Stage 5                       | 5                                                                                                                                                                                           | 5                             | pubic_tan                            |          | SEARCH                            | Self-reported, Axillary hair Tanner Stage<br>Custom     |
| 45878582   | None                                               | 1.None                                                                                                                                                                                      | 1.None                        | insurance                            |          | SEARCH                            | Primary Insurance<br>SNOMED                             |
| 2017000001 | Other                                              | 2.Other                                                                                                                                                                                     | 2.Other                       | insurance                            |          | SEARCH                            | Primary Insurance<br>Custom                             |
| 2017000002 | Government                                         | 3.Medicaid/Medicare                                                                                                                                                                         | 3.Medicaid/Medicare           | insurance                            |          | SEARCH                            | Primary Insurance<br>Custom                             |
| 2017000003 | Private                                            | 4.Private                                                                                                                                                                                   | 4.Private                     | insurance                            |          | SEARCH                            | Primary Insurance<br>Custom                             |
| 44814650   | No information                                     | .                                                                                                                                                                                           | Missing                       | insurance                            |          | SEARCH                            | Primary Insurance<br>PCORNet                            |
| 45878332   | Argentina                                          | 032                                                                                                                                                                                         | Argentina                     | cntry_birth                          |          | SEARCH                            | Country of birth<br>LOINC                               |
| 45881560   | Australia and Australian New Guinea                | 036                                                                                                                                                                                         | Australia                     | cntry_birth                          |          | SEARCH                            | Country of birth<br>LOINC                               |
| 45878482   | Canada                                             | 124                                                                                                                                                                                         | Canada                        | cntry_birth                          |          | SEARCH                            | Country of birth<br>LOINC                               |
| 45878328   | China (Peoples Republic of China)                  | 156                                                                                                                                                                                         | China                         | cntry_birth                          |          | SEARCH                            | Country of birth<br>LOINC                               |
| 45878327   | Egypt (United Arab Republic)                       | 818                                                                                                                                                                                         | Egypt                         | cntry_birth                          |          | SEARCH                            | Country of birth<br>LOINC                               |
| 45880683   | El Salvador                                        | 222                                                                                                                                                                                         | El Salvador                   | cntry_birth                          |          | SEARCH                            | Country of birth<br>LOINC                               |
| 45880681   | Ethiopia (Abyssinia), Eritrea                      | 231                                                                                                                                                                                         | Ethiopia                      | cntry_birth                          |          | SEARCH                            | Country of birth<br>LOINC                               |
| 45881552   | France, Corsica, Monaco                            | 250                                                                                                                                                                                         | France                        | cntry_birth                          |          | SEARCH                            | Country of birth<br>LOINC                               |
| 4329867    | The Gambia                                         | 270                                                                                                                                                                                         | Gambia                        | cntry_birth                          |          | SEARCH                            | Country of birth<br>LOINC                               |
| 45880064   | Georgia                                            | 268                                                                                                                                                                                         | Georgia                       | cntry_birth                          |          | SEARCH                            | Country of birth<br>LOINC                               |
| 45882201   | Germany (East and West)                            | 276                                                                                                                                                                                         | Germany                       | cntry_birth                          |          | SEARCH                            | Country of birth<br>LOINC                               |
| 45876270   | Guam                                               | 316                                                                                                                                                                                         | Guam                          | cntry_birth                          |          | SEARCH                            | Country of birth<br>LOINC                               |
| 45880673   | Guatemala                                          | 320                                                                                                                                                                                         | Guatemala                     | cntry_birth                          |          | SEARCH                            | Country of birth<br>LOINC                               |
| 45881560   | Australia and Australian New Guinea                | 324                                                                                                                                                                                         | Guinea                        | cntry_birth                          |          | SEARCH                            | Country of birth<br>LOINC                               |
| 45882203   | Iceland                                            | 352                                                                                                                                                                                         | Iceland                       | cntry_birth                          |          | SEARCH                            | Country of birth<br>LOINC                               |
| 45884233   | India                                              | 356                                                                                                                                                                                         | India                         | cntry_birth                          |          | SEARCH                            | Country of birth<br>LOINC                               |
| 45880067   | Iran (Persia)                                      | 364                                                                                                                                                                                         | Iran                          | cntry_birth                          |          | SEARCH                            | Country of birth<br>LOINC                               |
| 45881555   | Israel and former Jewish Palestine                 | 376                                                                                                                                                                                         | Israel                        | cntry_birth                          |          | SEARCH                            | Country of birth<br>LOINC                               |
| 45882205   | Italy (Sardinia, Sicily), San Marino, Vatican City | 380                                                                                                                                                                                         | Italy                         | cntry_birth                          |          | SEARCH                            | Country of birth<br>LOINC                               |
| 45880068   | Japan                                              | 392                                                                                                                                                                                         | Japan                         | cntry_birth                          |          | SEARCH                            | Country of birth<br>LOINC                               |
| 45880069   | Jordan (Transjordan) and former Arab Palestine     | 400                                                                                                                                                                                         | Jordan                        | cntry_birth                          |          | SEARCH                            | Country of birth<br>LOINC                               |
| 45884237   | Kenya                                              | 404                                                                                                                                                                                         | Kenya                         | cntry_birth                          |          | SEARCH                            | Country of birth<br>LOINC                               |
| 4329589    | Kuwait                                             | 414                                                                                                                                                                                         | Kuwait                        | cntry_birth                          |          | SEARCH                            | Country of birth<br>LOINC                               |
| 45876272   | Lebanon                                            | 422                                                                                                                                                                                         | Lebanon                       | cntry_birth                          |          | SEARCH                            | Country of birth<br>LOINC                               |
| 45882436   | Mexico                                             | 484                                                                                                                                                                                         | Mexico                        | cntry_birth                          |          | SEARCH                            | Country of birth<br>LOINC                               |
| 45882458   | Mongolia                                           | 496                                                                                                                                                                                         | Mongolia                      | cntry_birth                          |          | SEARCH                            | Country of birth<br>LOINC                               |
| 4329580    | Myanmar                                            | 104                                                                                                                                                                                         | Myanmar                       | cntry_birth                          |          | SEARCH                            | Country of birth<br>LOINC                               |
| 45876290   | New Zealand                                        | 554                                                                                                                                                                                         | New Zealand                   | cntry_birth                          |          | SEARCH                            | Country of birth<br>LOINC                               |
| 45884256   | Paru                                               | 604                                                                                                                                                                                         | Peru                          | cntry_birth                          |          | SEARCH                            | Country of birth<br>LOINC                               |
| 45876287   | Philippines (Philippine Islands)                   | 608                                                                                                                                                                                         | Philippines                   | cntry_birth                          |          | SEARCH                            | Country of birth<br>LOINC                               |
| 45878488   | Poland                                             | 616                                                                                                                                                                                         | Poland                        | cntry_birth                          |          | SEARCH                            | Country of birth<br>LOINC                               |
| 45880941   | Puerto Rico                                        | 630                                                                                                                                                                                         | Puerto Rico                   | cntry_birth                          |          | SEARCH                            | Country of birth<br>LOINC                               |
| 45876286   | Romania                                            | 642                                                                                                                                                                                         | Romania                       | cntry_birth                          |          | SEARCH                            | Country of birth<br>LOINC                               |
| 45884252   | Russian SFSR (Russia)                              | 643                                                                                                                                                                                         | Russia                        | cntry_birth                          |          | SEARCH                            | Country of birth<br>LOINC                               |
| 4330417    | Saudi Arabia                                       | 682                                                                                                                                                                                         | Saudi Arabia                  | cntry_birth                          |          | SEARCH                            | Country of birth<br>LOINC                               |
| 45876275   | Malaysia, Singapore, Brunei                        | 702                                                                                                                                                                                         | Singapore                     | cntry_birth                          |          | SEARCH                            | Country of birth<br>LOINC                               |
| 45880937   | Somalia (Somali Republic, Somaliland)              | 706                                                                                                                                                                                         | Somalia                       | cntry_birth                          |          | SEARCH                            | Country of birth<br>LOINC                               |
| 4330323    | South Korea                                        | 410                                                                                                                                                                                         | South Korea                   | cntry_birth                          |          | SEARCH                            | Country of birth<br>LOINC                               |
| 45878486   | Sweden                                             | 752                                                                                                                                                                                         | Sweden                        | cntry_birth                          |          | SEARCH                            | Country of birth<br>LOINC                               |
| 45878339   | Ukraine and Moldavia                               | 804                                                                                                                                                                                         | Ukraine                       | cntry_birth                          |          | SEARCH                            | Country of birth<br>LOINC                               |
| 4330418    | United Arab Emirates                               | 784                                                                                                                                                                                         | United Arab Emirates          | cntry_birth                          |          | SEARCH                            | Country of birth<br>LOINC                               |
| 45880074   | United Kingdom                                     | 826                                                                                                                                                                                         | United Kingdom                | cntry_birth                          |          | SEARCH                            | Country of birth<br>LOINC                               |
| 45880929   | United States                                      | 840                                                                                                                                                                                         | United States                 | cntry_birth                          |          | SEARCH                            | Country of birth<br>LOINC                               |
| 45880480   | Unknown/No answer                                  | 999                                                                                                                                                                                         | Unknown                       | cntry_birth                          |          | SEARCH                            | Country of birth<br>LOINC                               |
| 45876282   | Belgium                                            | 32                                                                                                                                                                                          | Belgium                       | cntry_birth                          |          | SEARCH                            | Country of birth<br>LOINC                               |
| 45882444   | Bulgaria                                           | 359                                                                                                                                                                                         | Bulgaria                      | cntry_birth                          |          | SEARCH                            | Country of birth<br>LOINC                               |
| 4073746    | Ivory Coast                                        | 225                                                                                                                                                                                         | Ivory Coast                   | cntry_birth                          |          | SEARCH                            | Country of birth<br>LOINC                               |
| 4073745    | Ghana                                              | 233                                                                                                                                                                                         | Ghana                         | cntry_birth                          |          | SEARCH                            | Country of birth<br>LOINC                               |
| 45880065   | Honduras                                           | 504                                                                                                                                                                                         | Honduras                      | cntry_birth                          |          | SEARCH                            | Country of birth<br>LOINC                               |
| 4073743    | South Africa                                       | 27                                                                                                                                                                                          | South Africa                  | cntry_birth                          |          | SEARCH                            | Country of birth<br>LOINC                               |
| 4320169    | Netherlands                                        | 31                                                                                                                                                                                          | Netherlands                   | cntry_birth                          |          | SEARCH                            | Country of birth<br>LOINC                               |
| 4133506    | Turkey                                             | 90                                                                                                                                                                                          | Turkey                        | cntry_birth                          |          | SEARCH                            | Country of birth<br>LOINC                               |
| 4188539    | Yes                                                | 1                                                                                                                                                                                           | Yes                           | hascore                              |          | SEARCH                            | ECF Indicator<br>SNOMED                                 |
| 4188540    | No                                                 | .                                                                                                                                                                                           | NULL                          | hascore                              |          | SEARCH                            | ECF Indicator<br>SNOMED                                 |
| 2020001001 | AIIMS, South Delhi - Centre 1                      | 1001                                                                                                                                                                                        | AIIMS, South Delhi - Centre 1 | reporting_code                       | Performa | YDR                               | Reporting Centre Code<br>Custom                         |
| 2020001002 | AIIMS, South Delhi - Centre 2                      | 1002                                                                                                                                                                                        | AIIMS, South Delhi - Centre 2 | reporting_code                       | Performa | YDR                               | Reporting Centre Code<br>Custom                         |
| 2020001003 | AIIMS, South Delhi - Centre 3                      | 1003                                                                                                                                                                                        | AIIMS, South Delhi - Centre 3 | reporting_code                       | Performa | YDR                               | Reporting Centre Code<br>Custom                         |
| 2020001004 | AIIMS, South Delhi - Centre 4                      | 1004                                                                                                                                                                                        | AIIMS, South Delhi - Centre 4 | reporting_code                       | Performa | YDR                               | Reporting Centre Code<br>Custom                         |
| 2020001005 | AIIMS, South Delhi - Centre 5                      | 1005                                                                                                                                                                                        | AIIMS, South Delhi - Centre 5 | reporting_code                       | Performa | YDR                               | Reporting Centre Code<br>Custom                         |
